# Supplementary material for: Rational re-design of Lactobacillus reuteri 121 inulosucrase for product chain length control
Source: Royal Society of Chemistry journal article supplement (doi:10.1039/c9ra02137j), 2019-01-01
Supplement: c9ra02137j1.pdf [file c9ra02137j1.pdf]

## Supplementary data

# Rational re-design of *Lactobacillus reuteri* 121 inulosucrase for product chain length control

Thanapon Charoenwongpaiboon<sup>a</sup>, Methus Klaewkla<sup>a,b</sup>, Surasak Chunsriviro<sup>a,b</sup>, Karan Wangpaiboon<sup>a</sup>, Robert A. Field<sup>c</sup>, Rath Pichyangkura<sup>a</sup> and Manchumas Hengsakul Prousoontorn<sup>a\*</sup>

<sup>a</sup> Department of Biochemistry, Faculty of Science, Chulalongkorn University, Pathumwan, Bangkok, Thailand

<sup>b</sup> Structural and Computational Biology Research Unit, Department of Biochemistry, Faculty of Science, Chulalongkorn University, Pathumwan, Bangkok, Thailand

<sup>c</sup> Department of Biological Chemistry, John Innes Centre, Norwich Research Park, Norwich, NR4 7UH, UK

**Table S1.** Oligonucleotide primers for site-directed mutagenesis

| Primer name | Sequence (5' - 3')                   |
|-------------|--------------------------------------|
| F_NdeI      | GGTACATATGCTAGAACGCAAGGAACATAAAAAAAT |
| R_699HIS    | GGTGCTCGAGTTTTAATCCATAACCAATTAAG     |
| F_R483A     | CCAATGATGATATTAAGAGTGCGCAACTTGGG     |
| R_R483A     | CCCAAGTTGCCGCACTCTTAATATCATCATTGG    |
| F_R483F     | CCAATGATGATATTAAGAGTTTCGCAACTTGGG    |
| R_R483F     | CCCAAGTTGCGAACTCTTAATATCATCATTGG     |
| F_R483Y     | CCAATGATGATATTAAGAGTTACGCAACTTGGG    |
| R_R483Y     | CCCAAGTTGCGTAACTCTTAATATCATCATTGG    |
| F_R483W     | CCAATGATGATATTAAGAGTTCCGCAACTTGGG    |
| R_R483W     | CCCAAGTTGCGGAACTCTTAATATCATCATTGG    |

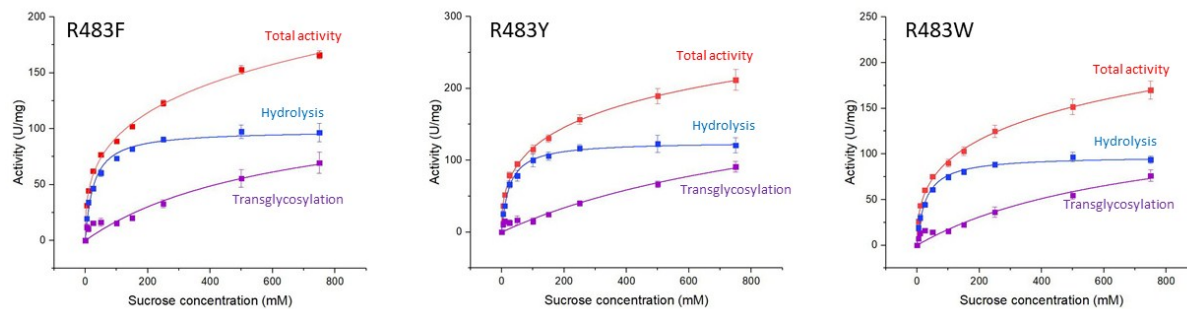

**Fig. S1** Graphs of relationship between initial velocity (V) and sucrose concentration for wild-type and mutant inulosucrase. The kinetic parameters were determined based on activity versus sucrose concentration curve, using 'OriginPro' as curve fitting software.
